# Supplementary material
Source: publisher figshare collection journal article supplement (https://karger.figshare.com/articles/dataset/_/5580004)
Supplement: Supplementary file 1 [file 1]

A

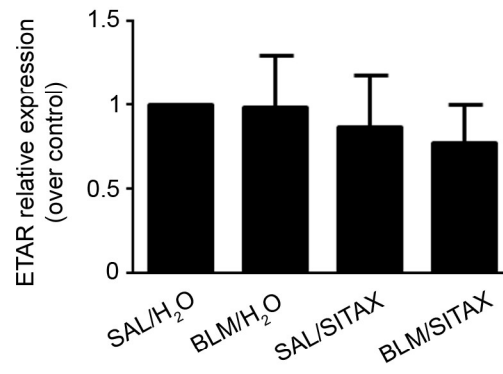

B

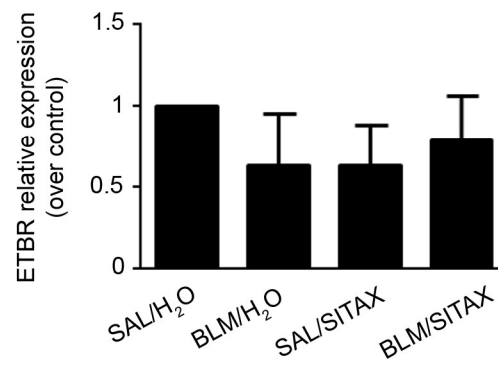

**Supplementary Figure 2** Endothelin-1 receptor A (A) and receptor B (B) mRNA levels in whole lung extracts from the four experimental groups (n=5 per group), as determined by real-time PCR. Values show mean mRNA levels ( $\pm$  SEM) relative to control group (SAL/H<sub>2</sub>O). Differences were tested with one-way ANOVA followed by Dunnett's multiple comparison test. No statistically significant differences were observed.
