# Supplementary material
Source: publisher figshare collection journal article supplement (https://karger.figshare.com/articles/dataset/_/5580004)
Supplement: Supplementary file 2 [file 1]

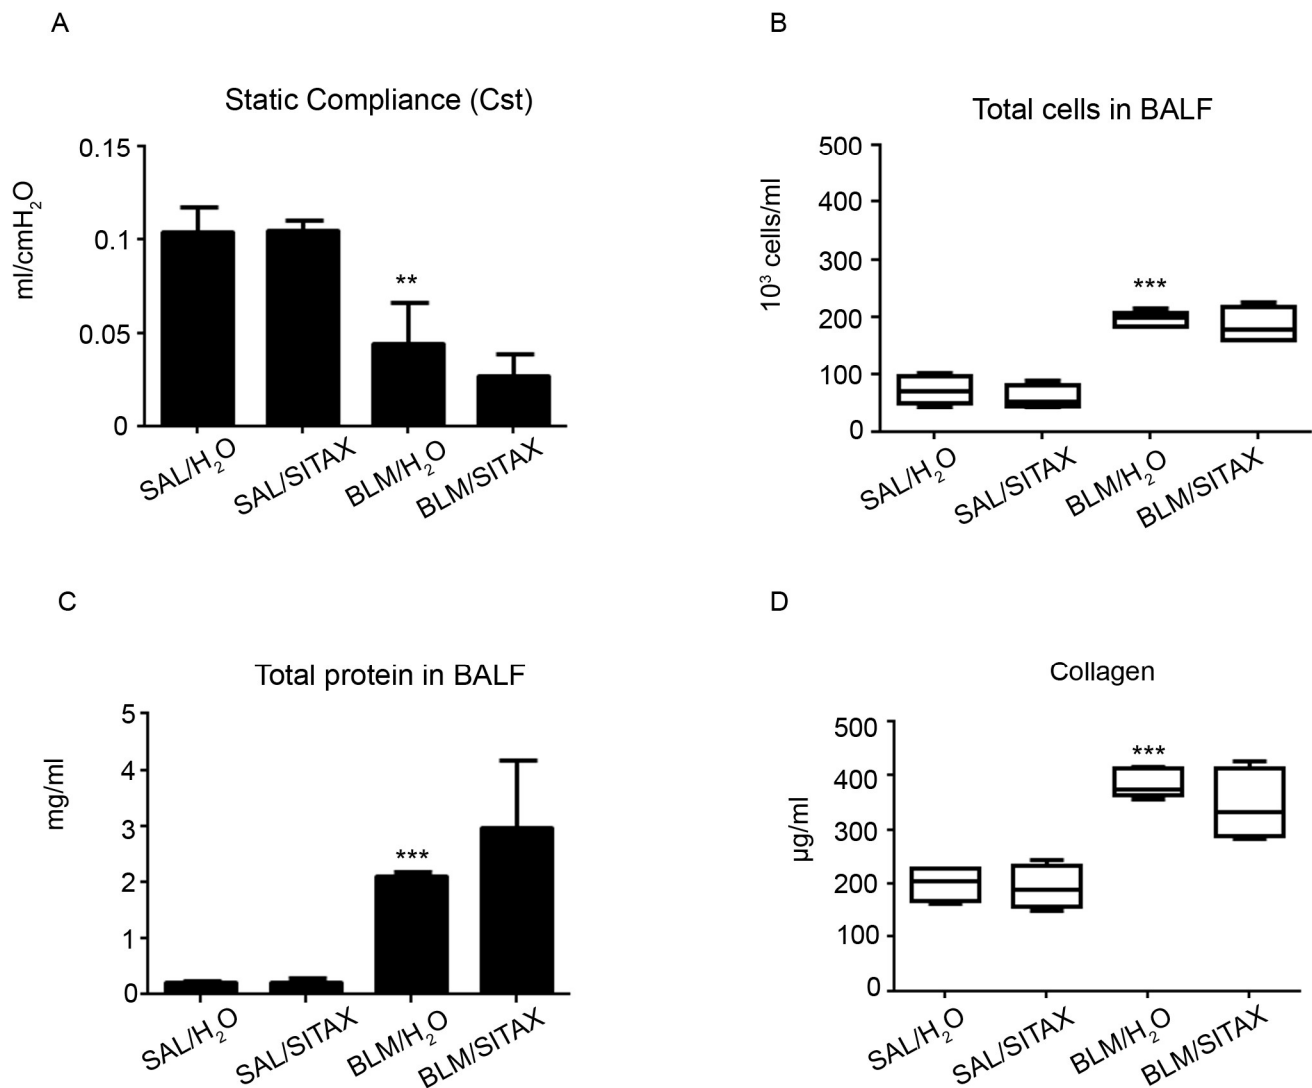

**Supplementary Figure 1** Therapeutic treatment with sitaxentan, beginning on day 7 post bleomycin does not alter lung function, infiltration and collagen deposition of bleomycin-challenged mice. All data shown are from mice sacrificed on day 21 post bleomycin.

(A) Static compliance measurements of all experimental groups.

(B) Total cell counts in BALF of mice.

(C) Protein concentration in BALF of mice receiving sitaxentan or H<sub>2</sub>O at day 21 post bleomycin.

(D) Soluble collagen levels in lung extracts of all mouse groups.

Data are expressed as means SEM, or boxplots (line in the box: median value; box edges: 25th to 75th centiles; whiskers: range of values).

Comparisons among groups were made using one-way ANOVA, followed by Tukey's post hoc test.

Differences between BLM/H<sub>2</sub>O and SAL/H<sub>2</sub>O groups are shown by \* (\*p<0.05; \*\*\*p<0.001).
